# Supplementary material for: Novel computed tomography-based tools reliably quantify plant reproductive investment
Source: PubMed Central journal article supplement (PMC5853293; doi:10.1093/jxb/erx405), 2017-12-23
Supplement: erx405_suppl_supplementary_data_s1.pdf [file erx405_suppl_supplementary_data_s1.pdf]

## Supplementary data S1. Choice of ANOVA test

We did not perform parametric tests because our data is nonparametric. Variables tested: number of ovules (n° ovules), number of pollen grains (n° pollen), and pollen to ovule ratio (P/O).

Shapiro-Wilk normality test ( $p < 0.05$  implies that data is not normally distributed):

|            |             |                     |
|------------|-------------|---------------------|
| n° ovules: | W = 0.85194 | p-value = 3.277e-07 |
| n° pollen: | W = 0.78335 | p-value = 7.737e-08 |
| P/O:       | W = 0.81865 | p-value = 5.745e-07 |

Bartlett test of homogeneity of variances ( $p < 0.05$  implies that the variance is not homogeneous):

|                     |                               |        |                     |
|---------------------|-------------------------------|--------|---------------------|
| n° ovules /species: | Bartlett's K-squared = 48.57  | df = 7 | p-value = 2.755e-08 |
| n° pollen /species: | Bartlett's K-squared = 84.247 | df = 7 | p-value = 1.869e-15 |
| P/O/species:        | Bartlett's K-squared = 15.006 | df = 7 | p-value = 0.03592]  |

We could log transform the variable "n° ovules" and "P/O" to meet the parametric criteria, but not the variable "n° pollen". We thus decided to use nonparametric tests for the three variables.
